# Supplementary material for: Interactive Effects of Nitrogen-Fixing Bacteria Inoculation and Nitrogen Fertilization on Soybean Yield in Unfavorable Edaphoclimatic Environments
Source: PubMed Central journal article supplement (PMC6821774; doi:10.1038/s41598-019-52131-7), 2019-10-30
Supplement: 41598_2019_52131_MOESM1_ESM.pdf [file 41598_2019_52131_MOESM1_ESM.pdf]

# INTERACTIVE EFFECTS OF NITROGEN-FIXING BACTERIA INOCULATION AND NITROGEN FERTILIZATION ON SOYBEAN YIELD IN UNFAVORABLE EDAPHOCLIMATIC ENVIRONMENTS

\*Carlos Felipe dos Santos Cordeiro<sup>1</sup> & Fábio Rafael Echer<sup>1</sup>

<sup>1</sup>Department of Agronomy, São Paulo Western University. Raposo Tavares HWY, Km 572, 19067-175, Presidente Prudente, São Paulo, Brazil. \*Corresponding author: cordeirocfs@gmail.com

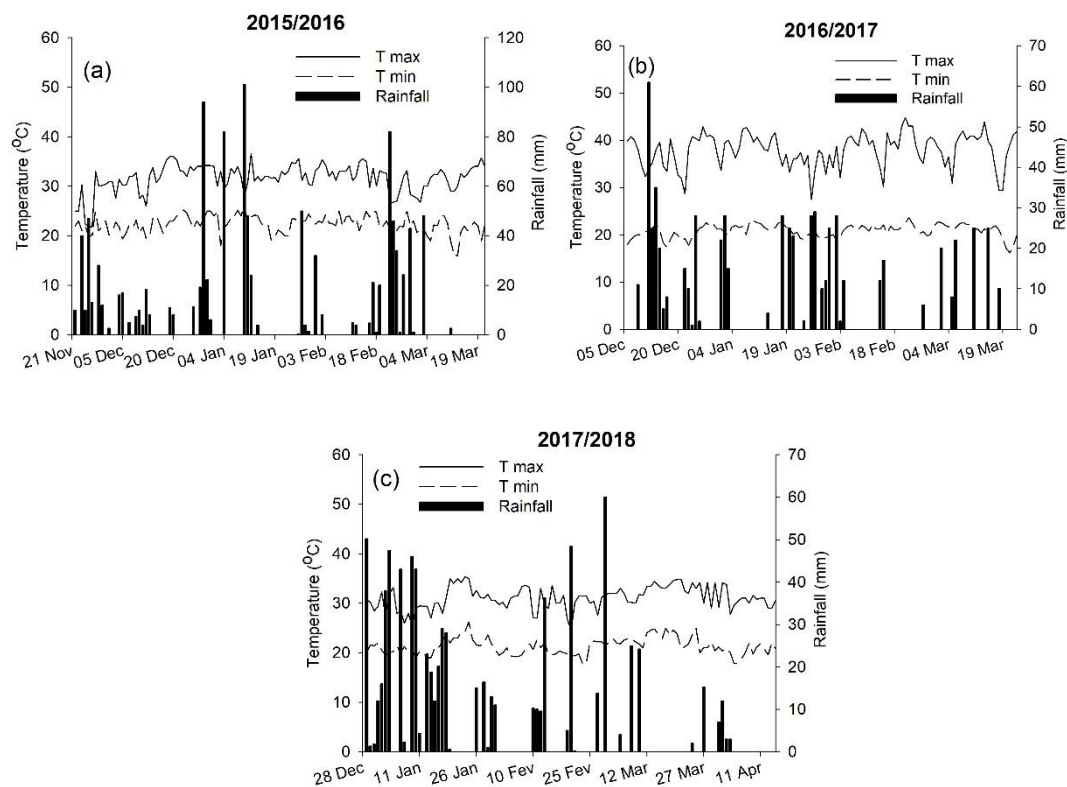

**Figure supplementary S1.** Rainfall, and maximum and minimum temperatures during the experiments, in the 2015/2016, 2016/2017, and 2017/2018 crop seasons. Presidente Bernardes, São Paulo, Brazil.

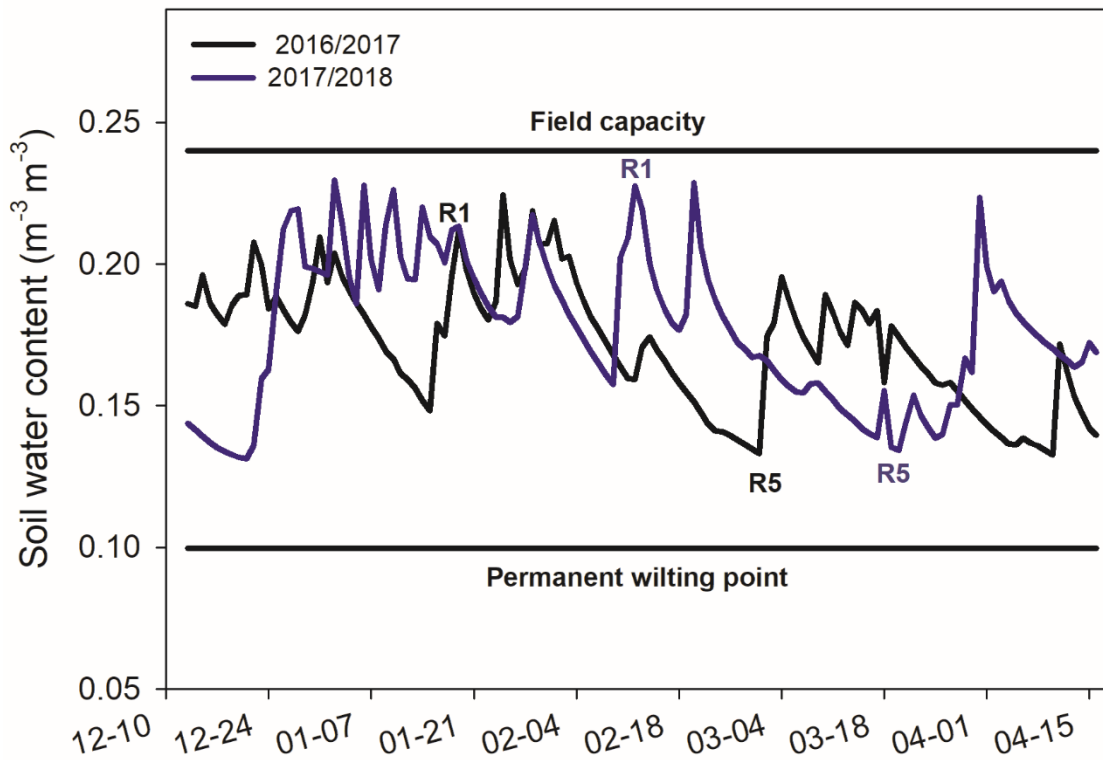

**Figure supplementary S2.** Soil water volume ( $\text{m}^3$ ) in the 0.0-0.5 m soil layer during the experiments, in the 2016/2017 and 2017/2018 crop seasons.

| Crop season            | pH  | SOM                | P                   | H+Al                              | K   | Ca   | Mg   | CEC  | Sand               | Clay | Soil density       |
|------------------------|-----|--------------------|---------------------|-----------------------------------|-----|------|------|------|--------------------|------|--------------------|
|                        |     | $\text{g dm}^{-3}$ | $\text{mg dm}^{-3}$ | ..... $\text{mmol dm}^{-3}$ ..... |     |      |      |      | $\text{g kg}^{-1}$ |      | $\text{g cm}^{-3}$ |
| Post-pasture area      |     |                    |                     |                                   |     |      |      |      |                    |      |                    |
| 2015/2016              | 5.0 | 8.9                | 2.1                 | 15.9                              | 0.6 | 7.5  | 3.8  | 27.5 | 844                | 101  | --                 |
| 2016/2017              | 4.3 | 16.2               | 0.1                 | 24.2                              | 0.6 | 1.6  | 1.4  | 27.7 | 830                | 105  | 1.61               |
| 2017/2018              | 5.0 | 10.9               | 5.0                 | 17.3                              | 0.7 | 6.1  | 3.7  | 27.8 | 824                | 106  | 1.62               |
| Post-soybean crop area |     |                    |                     |                                   |     |      |      |      |                    |      |                    |
| 2015/2016              | 5.2 | 13.8               | 12.9                | 19.7                              | 1.8 | 16.2 | 11.1 | 48.8 | 830                | 121  | --                 |
| 2016/2017              | 5.0 | 12.8               | 11.8                | 17.6                              | 0.6 | 11.8 | 5.9  | 35.9 | 852                | 110  | 1.67               |
| 2017/2018              | 4.8 | 10.3               | 20.3                | 22.9                              | 1.3 | 12.0 | 2.9  | 39.2 | 852                | 100  | 1.61               |

**Table supplementary S1.** Soil physical and chemical properties (0-0.20 m soil layer) of the post-pasture area and post-soybean crop area, in the 2015/2016, 2016/2017, and 2017/2018 soybean crop seasons.

|                                                                            | 2015/2016         |                        | 2016/2017         |                        | 2017/2018         |                        |
|----------------------------------------------------------------------------|-------------------|------------------------|-------------------|------------------------|-------------------|------------------------|
|                                                                            | Post-pasture area | Post-soybean crop area | Post-pasture area | Post-soybean crop area | Post-pasture area | Post-soybean crop area |
| Liming (kg ha <sup>-1</sup> )                                              | 1400              | 900                    | 1800              | 850                    | 2500              | 1800                   |
| (N-P <sub>2</sub> O <sub>5</sub> -K <sub>2</sub> O) (kg ha <sup>-1</sup> ) | 17-129-73         | 21-75-43               | 20-150-50         | 21-75-43               | 16-120-40         | 20-70-40               |
| K <sub>2</sub> O Topdressing (kg ha <sup>-1</sup> )                        | 60                |                        |                   |                        |                   |                        |
| Sowing time                                                                | 21/11/2015        |                        | 05/12/2016        |                        | 28/12/2017        |                        |
| Density plant (m <sup>-2</sup> )                                           | 31.1              | 30.9                   | 29.5              | 33.4                   | 22.9              | 23.8                   |

**Table supplementary S2.** Liming and fertilizer rates, sowing time, and density of soybean plants in the 2015/2016, 2016/2017, and 2017/2018 crop seasons.

| Crop season | Post-pasture area                         |                 | Post-soybean crop area                    |                    |
|-------------|-------------------------------------------|-----------------|-------------------------------------------|--------------------|
|             | Dry matter                                | Carbon/nitrogen | Dry matter                                | Carbon/nitrogen    |
|             | kg ha <sup>-1</sup>                       | -               | kg ha <sup>-1</sup>                       | -                  |
|             | Shoot                                     |                 |                                           |                    |
| 2015/2016   | 1592                                      | 50.4            | 1992                                      | 44.9               |
| 2016/2017   | 1615                                      | 69.8            | 2266                                      | 38.3               |
| 2017/2018   | 1188                                      | 47.7            | 5574                                      | 56.1               |
|             | Root                                      |                 |                                           |                    |
|             | kg m <sup>-3</sup> (kg ha <sup>-1</sup> ) | C/N             | kg m <sup>-3</sup> (kg ha <sup>-1</sup> ) | g kg <sup>-1</sup> |
| 2015/2016   | 1.0 (2000)                                | 90.5            | 0.9 (1990)                                | 60.8               |
| 2016/2017   | 1.3 (2760)                                | 112.6           | 1.12 (2240)                               | 97.8               |
| 2017/2018   | 0.4 (855)                                 | 52.7            | 1.62 (3240)                               | 65.8               |

**Table supplementary S3.** Dry matter and carbon to nitrogen ratio of the previous crop (*Urochloa brizantha*) to soybean.
